# Supplementary material for: A triboelectric nanogenerator using degradable surface-modified cellulose acetate and ferroelectric gelatin composite nanofibers
Source: Royal Society of Chemistry journal article supplement (doi:10.1039/d3ta04879a), 2023-12-22
Supplement: d3ta04879a3.pdf [file d3ta04879a3.pdf]

## SUPPORTING INFORMATION

# Triboelectric nanogenerator using degradable surface-modified cellulose acetate and ferroelectric gelatin composite nanofiber

*Viet Anh Cao*<sup>1</sup>, *Minje Kim*<sup>1</sup>, *Phuoc Cao Van*<sup>2</sup>, *Jong-Ryul Jeong*<sup>2</sup>, *Soo Young Kim*<sup>3,\*</sup>, *Junghyo Nah*<sup>1,\*</sup>

<sup>1</sup> Department of Electrical Engineering, Chungnam National University, Daejeon, 34134, Korea

<sup>2</sup> Department of Material Science and Engineering, Chungnam National University, Daejeon, 34134, Korea

<sup>3</sup> College of Pharmacy, Yeungnam University, Gyeongsan 38541, Korea

\* Corresponding authors: [sooykim@yu.ac.kr](mailto:sooykim@yu.ac.kr), [jnah@cnu.ac.kr](mailto:jnah@cnu.ac.kr)

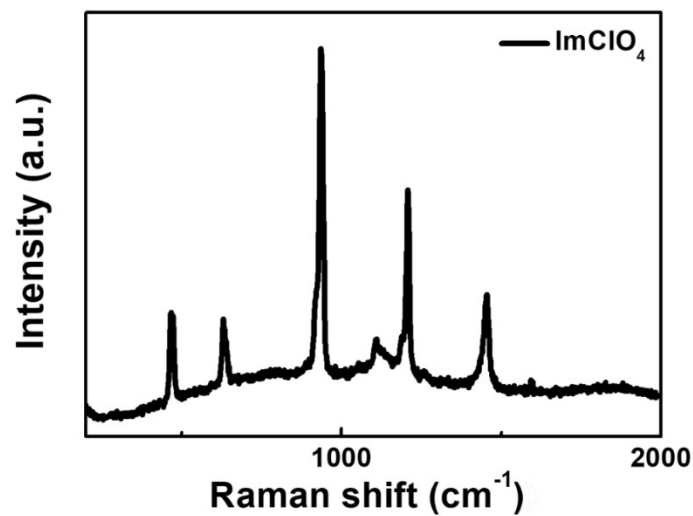

Fig. S1. Raman spectroscopy of ImClO<sub>4</sub> crystal

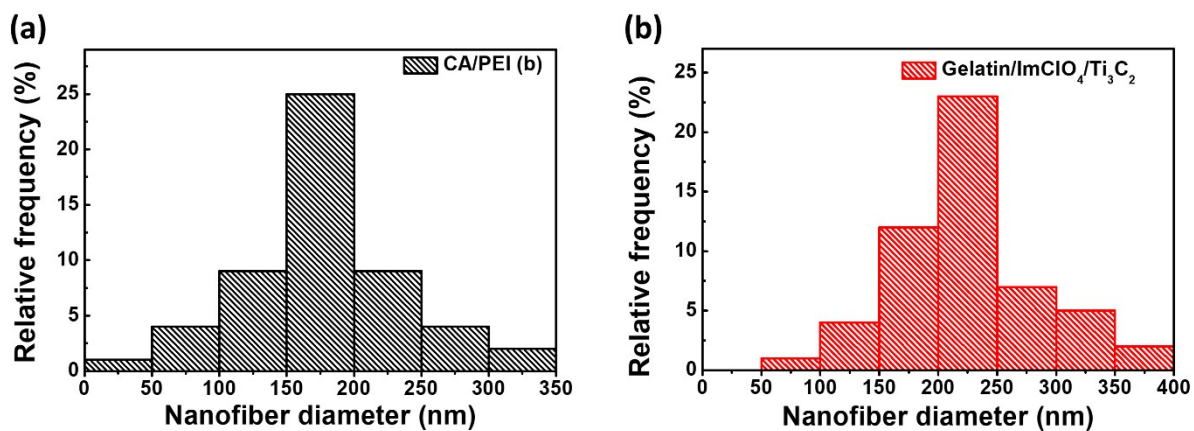

Fig. S2. The statistical diameter size distribution of (a) CA/PEI(b) and (b) gelatin/ImClO<sub>4</sub>/Ti<sub>3</sub>C<sub>2</sub> nanofiber

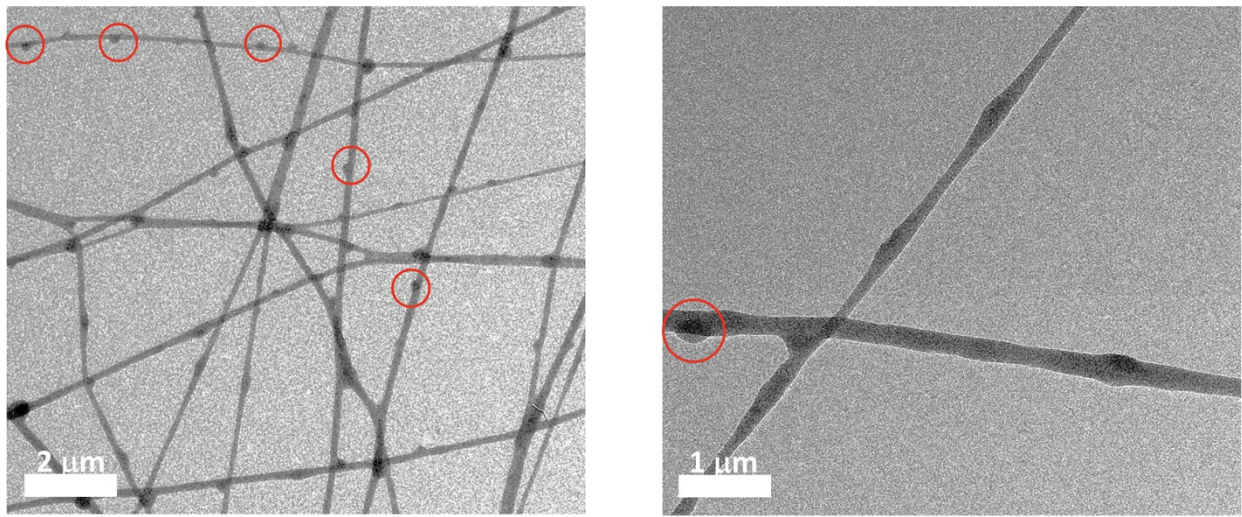

**Fig. S3.** TEM images of the gelatin/ImClO<sub>4</sub>/Ti<sub>3</sub>C<sub>2</sub> composite nanofiber.

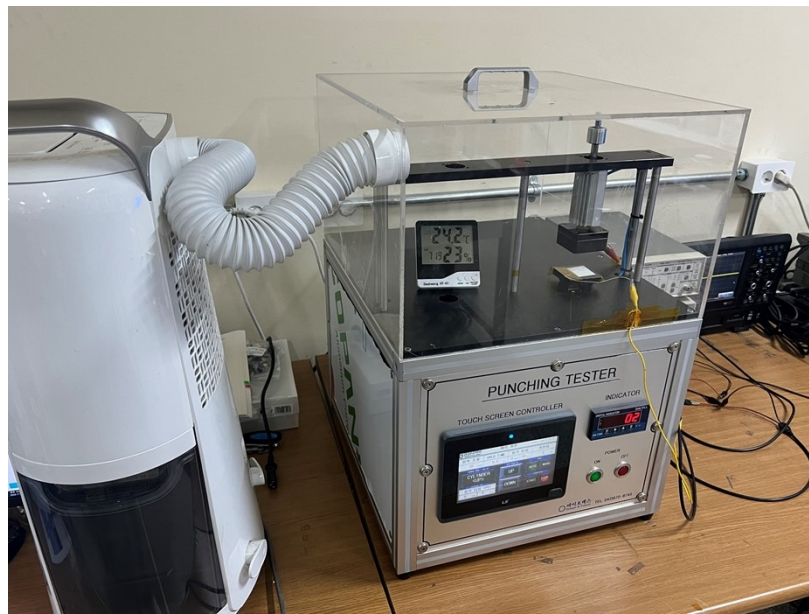

**Fig. S4:** TENGs measurement setup placed inside the chamber connected to a humidity control system.

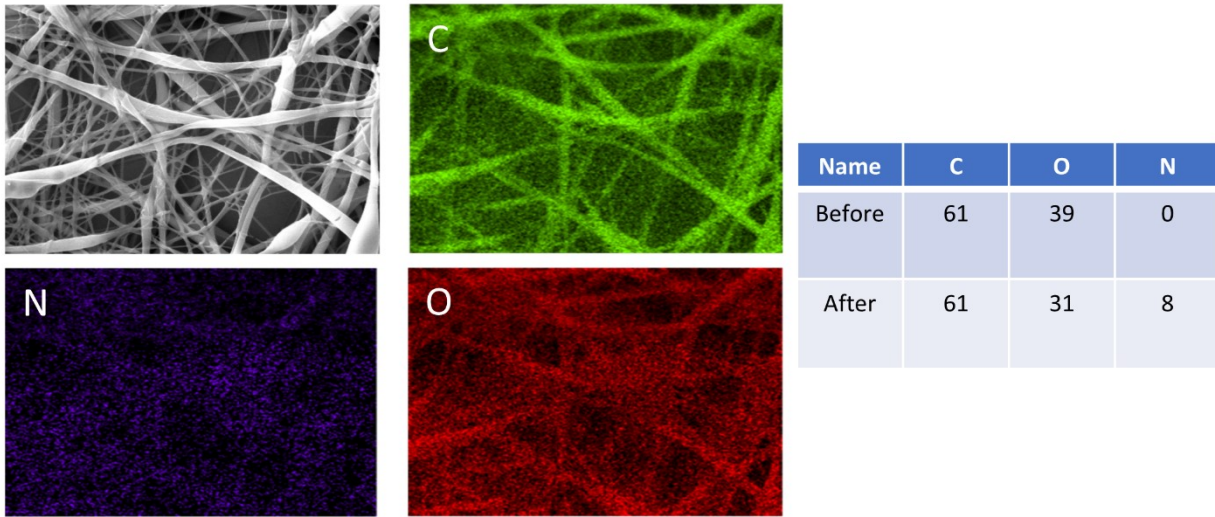

**Fig. S5.** Elemental mapping of CA/PEI(b) nanofiber and comparison of EDS analysis before and after surface modification.

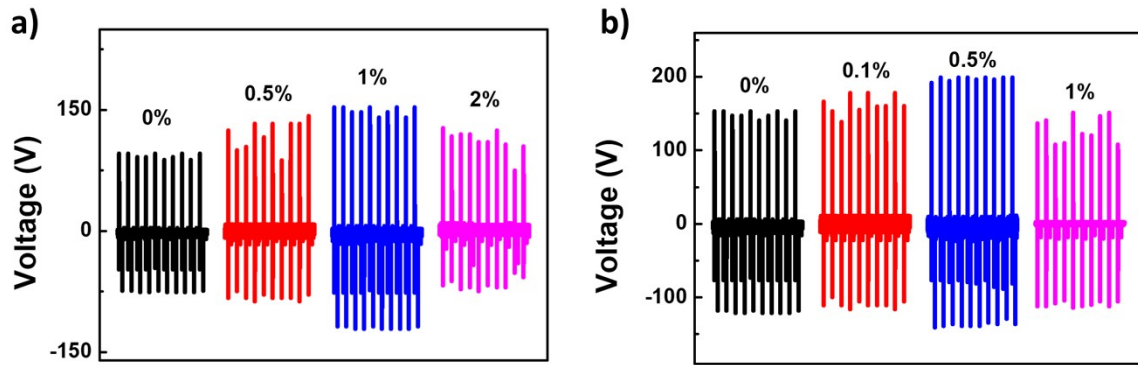

**Fig. S6.** a) Output open-circuit voltage of TENG measured by contact electrification of gelatin with different wt% of ImClO<sub>4</sub> against CA nanofiber. b) Output open-circuit voltage of TENG measured by contact electrification of gelatin/ImClO<sub>4</sub> with different wt% of Ti<sub>3</sub>C<sub>2</sub> against CA nanofiber.

**Table S1** Comparison of current density and power density of the TENG with other works reported previously.

| No | Positive  | Negative                                                   | Voltage (V) | Current density (μA/cm <sup>2</sup> ) | Power density (μW/cm <sup>2</sup> ) | Reference |
|----|-----------|------------------------------------------------------------|-------------|---------------------------------------|-------------------------------------|-----------|
| 1  | CA/PEI(b) | Gelatin/ImClO <sub>4</sub> /Ti <sub>3</sub> C <sub>2</sub> | 300         | 10                                    | 500                                 | This work |
| 2  | PLA       | Gelatin                                                    | 500         | 1.06                                  | 100                                 | [32]      |

|           |                              |                         |      |      |       |      |
|-----------|------------------------------|-------------------------|------|------|-------|------|
| <b>3</b>  | Gelatin/glycerol             | PTFE                    | 58.2 | -    | -     | [43] |
| <b>4</b>  | Gelatin                      | PTFE/PDMS               | 130  | 0.35 | 45.8  | [38] |
| <b>5</b>  | Cellulose paper              | Nitrocellulose membrane | 60   | 8.8  | 83    | [42] |
| <b>6</b>  | Cellulose nanocrystal        | PTFE                    | 205  | 18   | -     | [41] |
| <b>7</b>  | Wheat straw                  | FEP                     | 250  | 12   | -     | [36] |
| <b>8</b>  | Rice paper                   | PVC                     | 244  | 6    | 376.4 | [44] |
| <b>9</b>  | Laver                        | FEP                     | 23   | 315  |       | [34] |
| <b>10</b> | Bacterial nanocellulose (BC) | CU                      | 13   | -    | -     | [35] |
| <b>11</b> | BC                           | BC/CNT/PPy              | 29   | 0.6  | 3     | [37] |
| <b>12</b> | PLA                          | PVDF-HFP                | 140  | 3.8  | 75    | [40] |
| <b>13</b> | Wood                         | PTFE                    | 81   | 1.8  | 50    | [39] |
